# Supplementary material for: Single-Target Implicit Association Tests (ST-IAT) Predict Voting Behavior of Decided and Undecided Voters in Swiss Referendums
Source: PubMed Central journal article supplement (PMC5061388; doi:10.1371/journal.pone.0163872), 2016-10-12
Supplement: pone.0163872.s001.pdf [file pone.0163872.s001.pdf]

**Stimuli List for ST-IATs on Minimum Wage Initiative  
& Gripen Referendum (Study 1)**

| <b>Category</b>         | <b>Stimuli</b>                                                                                                                 |
|-------------------------|--------------------------------------------------------------------------------------------------------------------------------|
| positive                | Love (Liebe), Joy (Freude), Paradise (Paradies), Gift (Geschenk), Holiday (Ferien)                                             |
| negative                | Poison (Gift), Stink (Gestank), Disease (Krankheit), Disaster (Katastrophe), Death (Tod)                                       |
| Minimum Wage Initiative | Cédric Wermuth (words), Christian Levrat (words), Campaign Poster (picture), SP party emblem (picture), UNIA emblem (picture)  |
| Gripen Referendum       | Schweizer Armee (words), Ueli Maurer (words), Campaign Poster (picture), Gripen fighter jet (picture), André Blattmann (photo) |

Note: Original German positive and negative stimuli are in brackets. Target stimuli were words and pictures.
