# Supplementary material for: Single-Target Implicit Association Tests (ST-IAT) Predict Voting Behavior of Decided and Undecided Voters in Swiss Referendums
Source: PubMed Central journal article supplement (PMC5061388; doi:10.1371/journal.pone.0163872), 2016-10-12
Supplement: pone.0163872.s002.pdf [file pone.0163872.s002.pdf]

**First condition of computer-administered  
paper-format ST-IAT (Study 2)**

|          |                                              |
|----------|----------------------------------------------|
| Positive | Negative                                     |
|          | or                                           |
|          | Initiative for<br>Public Health<br>Insurance |

|   |                            |   |
|---|----------------------------|---|
| ○ | Love                       | ○ |
| ○ | Joy                        | ○ |
| ○ | Jacqueline<br>Fehr (SP)    | ○ |
| ○ | SP                         | ○ |
| ○ | Paradise                   | ○ |
| ○ | Yvonne<br>Gilli<br>(Green) | ○ |
| ○ | Poison                     | ○ |
| ○ | Gift                       | ○ |
| ○ | Holidays                   | ○ |
| ○ | Green<br>Party             | ○ |
| ○ | EVP                        | ○ |
| ○ | Love                       | ○ |
| ○ | Stink                      | ○ |
| ○ | Joy                        | ○ |
| ○ | Jacqueline<br>Fehr (SP)    | ○ |
| ○ | SP                         | ○ |
| ○ | Disease                    | ○ |
| ○ | Disaster                   | ○ |
| ○ | Holidays                   | ○ |
| ○ | Gift                       | ○ |
| ○ | EVP                        | ○ |
| ○ | Paradise                   | ○ |
| ○ | Death                      | ○ |
| ○ | Green<br>Party             | ○ |
| ○ | Yvonne<br>Gilli<br>(Green) | ○ |
