# Supplementary material for: Single-Target Implicit Association Tests (ST-IAT) Predict Voting Behavior of Decided and Undecided Voters in Swiss Referendums
Source: PubMed Central journal article supplement (PMC5061388; doi:10.1371/journal.pone.0163872), 2016-10-12
Supplement: pone.0163872.s003.pdf [file pone.0163872.s003.pdf]

**Stimuli List for ST-IAT on Public Health  
Insurance Initiative (Study 2)**

| <b>Category</b>                    | <b>Stimuli</b>                                                                           |
|------------------------------------|------------------------------------------------------------------------------------------|
| positive                           | Love (Liebe), Joy (Freude), Paradise (Paradies), Gift (Geschenk), Holiday (Ferien)       |
| negative                           | Poison (Gift), Stink (Gestank), Disease (Krankheit), Disaster (Katastrophe), Death (Tod) |
| Public Health Insurance Initiative | Jacqueline Fehr (SP), SP, Yvonne Gilli (Grüne), Grüne Partei, EVP                        |

Note: Original German positive and negative stimuli are in brackets. Target stimuli were only words.
