# Supplementary material for: Single-Target Implicit Association Tests (ST-IAT) Predict Voting Behavior of Decided and Undecided Voters in Swiss Referendums
Source: PubMed Central journal article supplement (PMC5061388; doi:10.1371/journal.pone.0163872), 2016-10-12
Supplement: pone.0163872.s004.pdf [file pone.0163872.s004.pdf]

**Stimuli List for ST-IAT on Ecopop Initiative  
(Study 3)**

| Category                      | Stimuli                                                                                                                                                    |
|-------------------------------|------------------------------------------------------------------------------------------------------------------------------------------------------------|
| positive                      | Love (Liebe/Amour), Joy<br>(Freude/Joie), Paradise<br>(Paradies/Paradis), Gift<br>(Geschenk/Cadeau), Holiday<br>(Ferien/Vacances)                          |
| negative                      | Poison (Gift/Poison), Stink<br>(Gestank/Puanteur), Disease<br>(Krankheit/Maladie), Disaster<br>(Katastrophe/Catastrophe), Death<br>(Tod/Mort)              |
| Ecopop Initiative<br>(German) | Thomas Minder, Schweizer<br>Demokraten (SD), Hans Geiger<br>(SVP), Aktion für eine Un-<br>abhängige und Neutrale Schweiz<br>(AUNS), Pirmin Schwander (SVP) |
| Ecopop Initiative<br>(French) | Thomas Minder, Démocrates Su-<br>isses (DS), Philippe Roch, Action<br>pour une Suisse Indépendante et<br>Neutre (ASIN), Pirmin Schwander<br>(SVP)          |

Note: Original German and French positive and negative stimuli are in brackets. Target stimuli were only words.
